# Supplementary material
Source: PubMed Central journal article supplement (PMC7611409)
Supplement: EMS130952-supplement-Supplementary_figures.pdf [file EMS130952-supplement-Supplementary_figures.pdf]

## Stained ECs

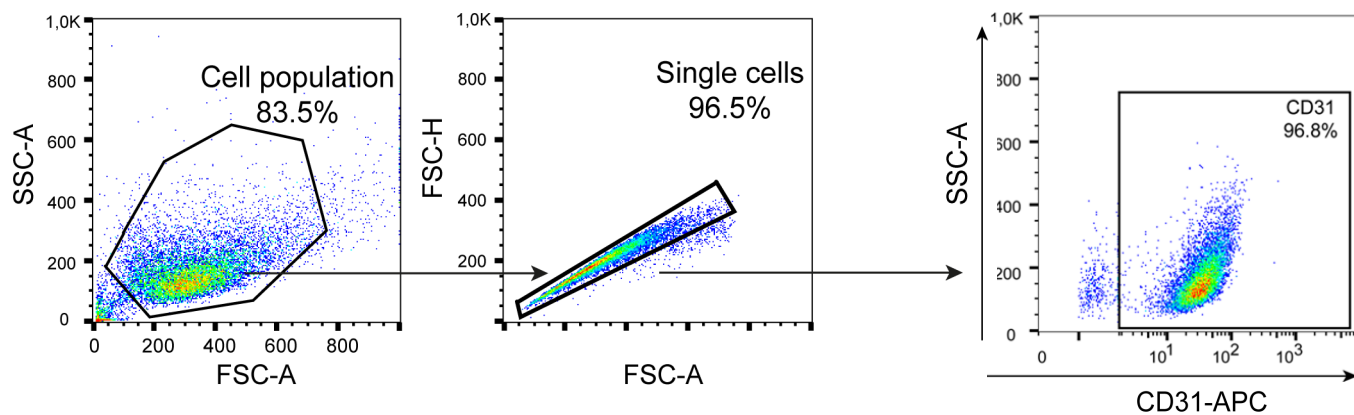

## Negative control

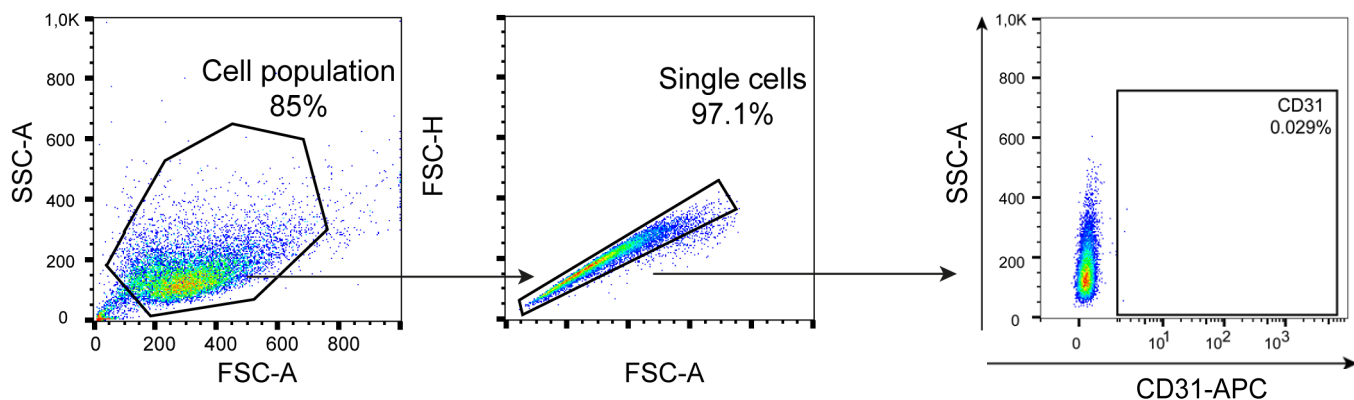

**Supplementary Figure 1: Gating strategy used for FACS analysis of hiPSC-ECs.** (a) Forward and side scatter dot plots showing the starting cell population, (b) the gating to discriminate single cells and (c) the gating to isolate CD43-APC positive cells with the help of cells stained with isotype control (APC). The percentage of the relevant cell populations are provided. Cells were acquired with a MACSQuant VYB (Miltenyi Biotech) and analyzed with FlowJo Software.

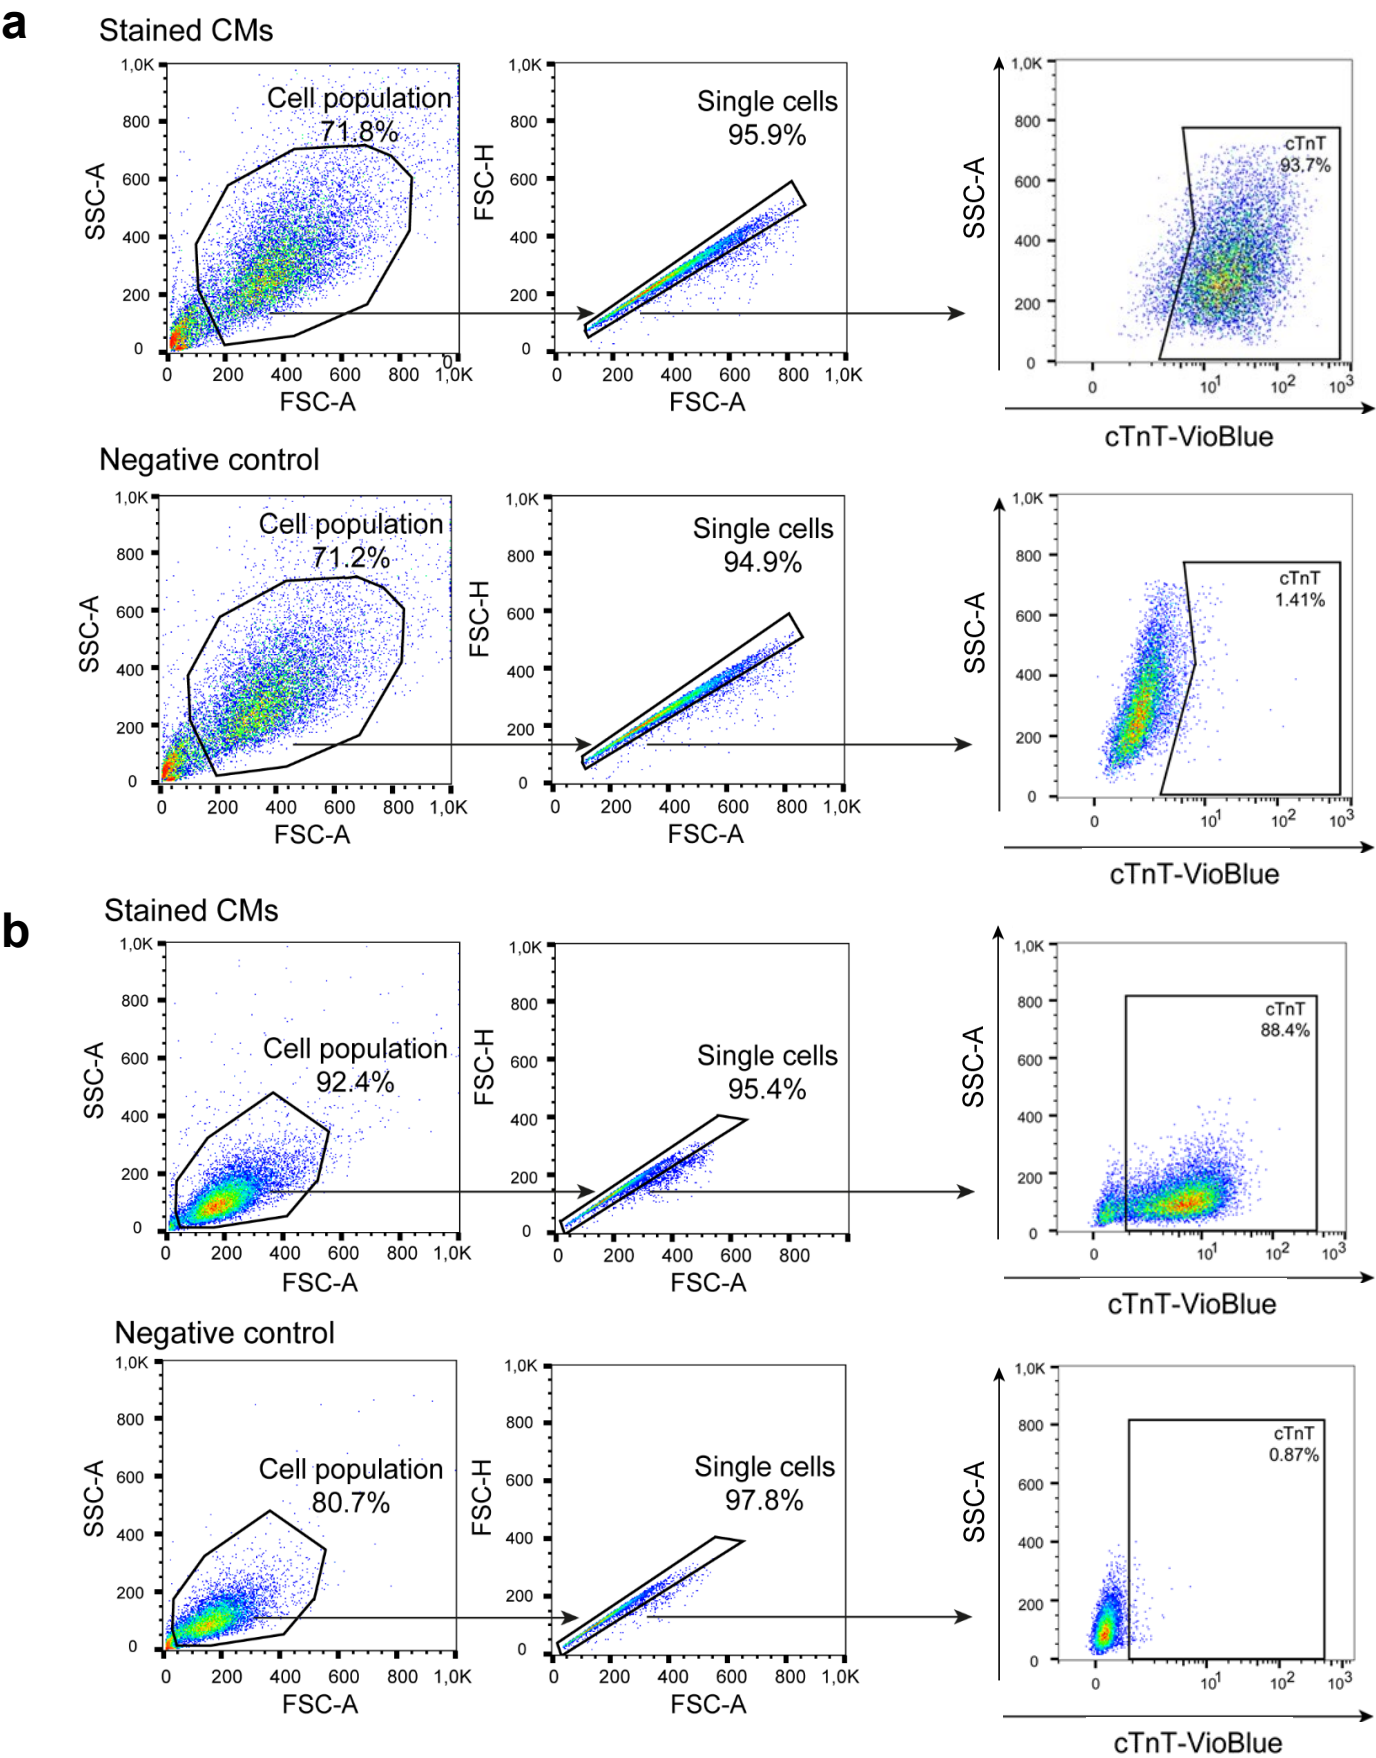

**Supplementary Figure 2: Gating strategy used for FACS analysis of hiPSC-CMs.** (a) Forward and side scatter dot plots showing the starting cell population, (b) the gating to discriminate single cells and (c) the gating to isolate TNNT-VioBlue positive cells with the help of unstained cells (mBEL) or cells stained with isotype control (VioBlue). The percentage of the relevant cell populations are provided. Cells were acquired with a MACSQuant VYB (Miltenyi Biotech) and analyzed with FlowJo Software.

**a**

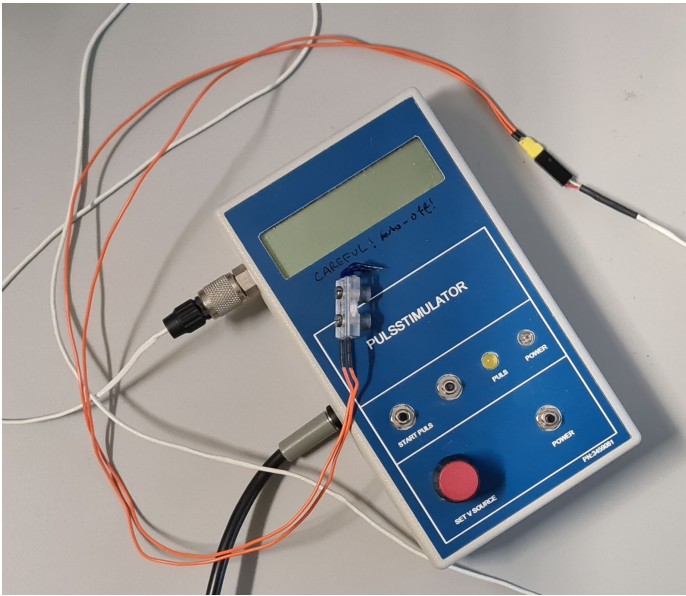

**b**

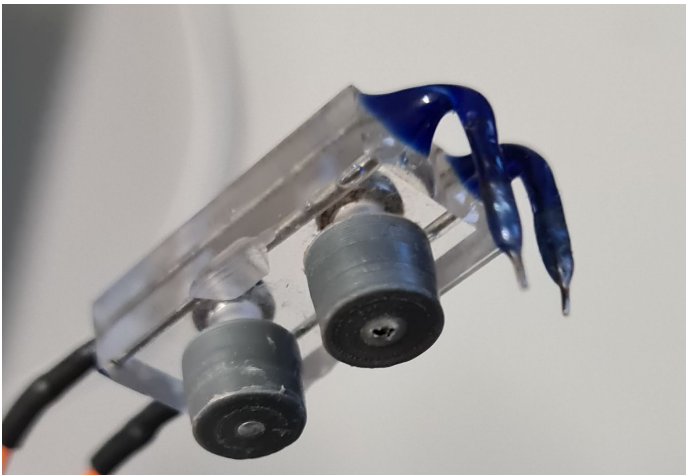

**Supplementary Figure 3: Equipment used for electrical pacing of cardiac MTs.** (a) Pulse stimulator connected to custom-made electrodes fitting the V-shaped 96-wells and (b) details of custom-made electrodes.
