# Supplementary material
Source: PubMed Central journal article supplement (PMC7611409)
Supplement: EMS130952-supplement-Supplementary_Video.pdf [file EMS130952-supplement-Supplementary_Video.pdf]

## SUPPLEMENTARY INFORMATION

**Supplementary Figure 1: Gating strategy used for FACS analysis of hiPSC-ECs.** (a) Forward and side scatter dot plots showing the starting cell population, (b) the gating to discriminate single cells and (c) the gating to isolate CD43-APC positive cells with the help of cells stained with isotype control (APC). The percentage of the relevant cell populations are provided. Cells were acquired with a MACSQuant VYB (Miltenyi Biotech) and analyzed with FlowJo Software.

**Supplementary Figure 2: Gating strategy used for FACS analysis of hiPSC-CMs.** (a) Forward and side scatter dot plots showing the starting cell population, (b) the gating to discriminate single cells and (c) the gating to isolate cTnT-VioBlue positive cells with the help of unstained cells (mBEL) or cells stained with isotype control (VioBlue). The percentage of the relevant cell populations are provided. Cells were acquired with a MACSQuant VYB (Miltenyi Biotech) and analyzed with FlowJo Software.

**Supplementary Figure 3: Equipment used for electrical pacing of cardiac MTs.** (a) Pulse stimulator connected to custom-made electrodes fitting the V-shaped 96-wells and (b) details of custom-made electrodes.

**Supplementary Video 1:** Beating monolayer hiPSC-CMs after 21 d of differentiation using LI-BPEL protocol with lactate purification

**Supplementary Video 2:** Beating monolayer hiPSC-CMs after 21 d of differentiation using mBPEL protocol

**Supplementary Video 3:** Time-lapse movie of the first 72 h of MT formation (time frame: 15 min)

**Supplementary Video 4:** Movie of representative MT showing CD31 positive endothelial cells organized in a vessel-like structure (in red) and cardiomyocytes stained with ACTN2 (in green) (15 f.p.s.)

**Supplementary Video 5:** Contracting MT paced at 1 Hz at after 21 d in culture

**Supplementary Video 6:** Contracting MT loaded with Fluo-4, paced at 1.5 Hz after 21 d in culture

**Supplementary Table 1:** Raw data about morphological, contraction and single-cell electrophysiological parameters measured in LUMC0099iCTRL04 and LUMC0020iCTRL06 hiPSC lines, relative to Table 3.
